# Supplementary material for: A single nanofluorophore “turn on” probe for highly sensitive visual determination of environmental fluoride ions
Source: Royal Society of Chemistry journal article supplement (doi:10.1039/c7ra13601c), 2018-01-01
Supplement: c7ra13601c1.pdf [file c7ra13601c1.pdf]

## Electronic Supplementary Information

### **A single nanofluorophore “turn on” probe for highly sensitive visual determination of environmental fluoride ions**

Yangjie Li,<sup>‡a,b</sup> Qin Sun,<sup>‡a,b</sup> Lei Su,<sup>a,b</sup> Linlin Yang,<sup>a,c</sup> Jian Zhang,<sup>a,e</sup> Liang Yang,<sup>\*a,c</sup> Bianhu Liu,<sup>a,c</sup> Changlong Jiang<sup>a,c</sup> and Zhongping Zhang<sup>\*a,c,d</sup>

<sup>a</sup> CAS Center for Excellence in Nanoscience, Institute of Intelligent Machines, Chinese Academy of Sciences, Hefei, Anhui 230031, China.

<sup>b</sup> Department of Chemistry, University of Science and Technology of China, Hefei, Anhui 230026, China.

<sup>c</sup> State Key Laboratory of Transducer Technology Chinese Academy of Sciences, Hefei, Anhui, 230031, China.

<sup>d</sup> School of Chemistry and Chemical Engineering, Anhui University, Hefei, Anhui 230601 China.

<sup>e</sup> Department of Applied Chemistry, Anhui Agricultural University, Hefei, Anhui 230036, China.

\*Corresponding author E-mail: yangliang@iim.ac.cn, zpzhang@iim.ac.cn.

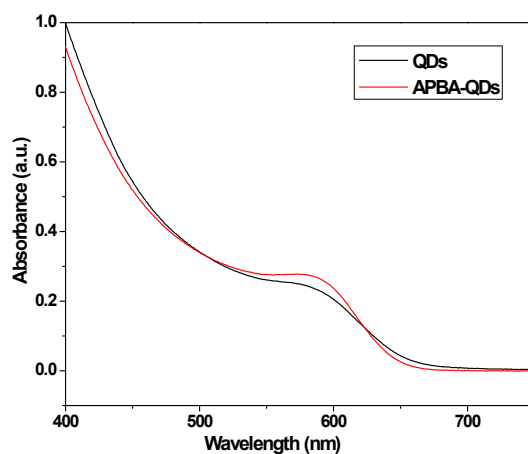

**Fig. S1** Absorption spectra of CdTe QDs (black) and APBA-QDs (red). Solution were prepared in 10 mM PBS buffer (pH=7.4).

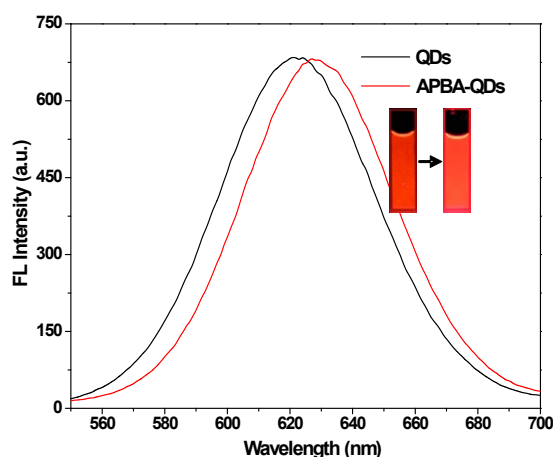

**Fig. S2** The fluorescence emission spectra of CdTe QDs (black) and APBA-QDs (red). Inset photographs of CdTe QDs (left) and APBA modified QDs (right) in aqueous solution were taken under a 365 nm UV lamp.

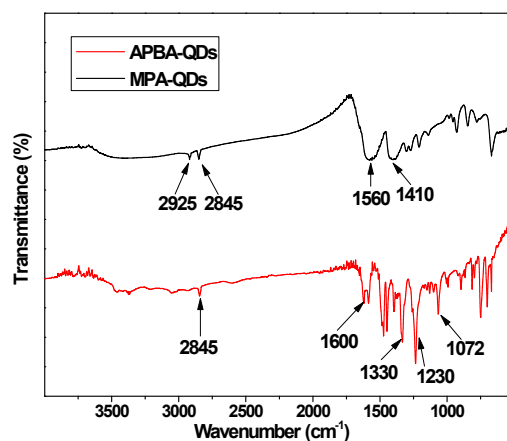

**Fig. S3** The FT-IR spectra of MPA-QDs (black) and APBA-QDs (red).

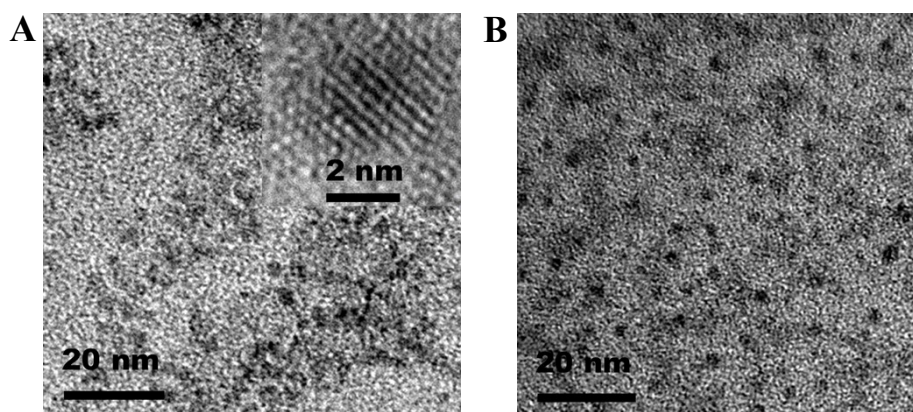

**Fig. S4** TEM images of (A) the QDs (inset: the corresponding HR-TEM image) and (B) the modified completely nanoprobe.

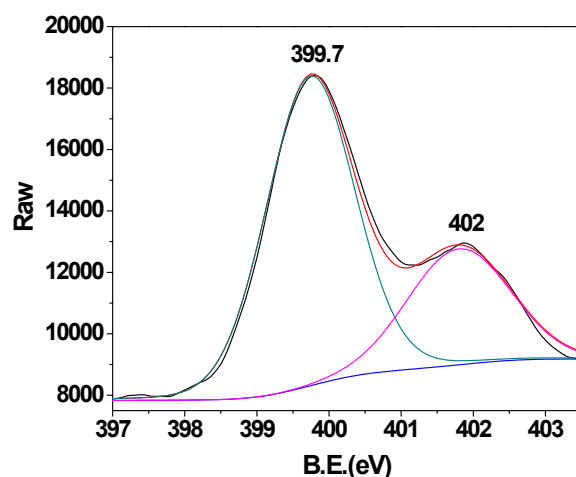

**Fig. S5** XPS spectrum of the as-prepared APBA modified CdTe QDs. In detail, 399.7 and 402 eV were attributed to N 1s binding energies of N-C and N-H of amide groups, respectively.

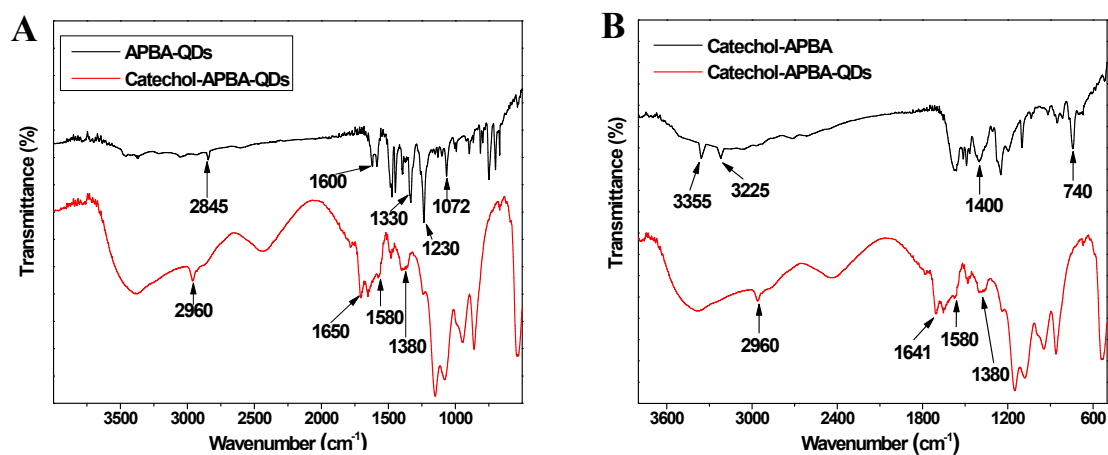

**Fig. S6** (A) The FR-IT spectrum of APBA-QDs (black) and catechol-APBA-QDs (red). (B) The FR-IT spectrum of catechol-APBA (black) and catechol-APBA-QDs (red).

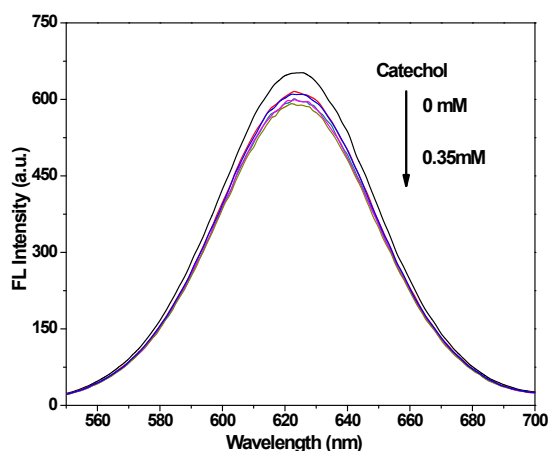

**Fig. S7** The fluorescence spectra of the unmodified CdTe QDs solution with the addition of catechol.

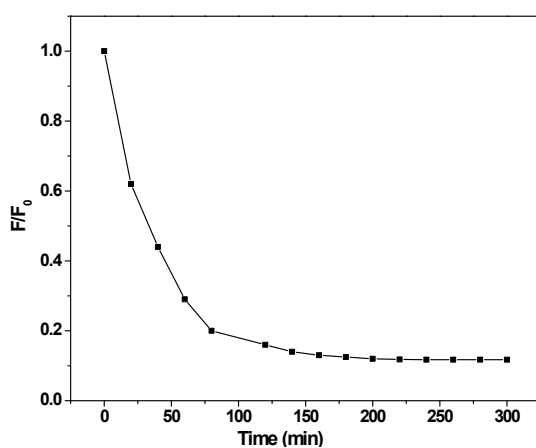

**Fig. S8** The kinetics of fluorescence quenching of the APBA-QDs aqueous solution. The fluorescence quenching efficiency ( $F/F_0$ ) of APBA-QDs via time with addition of 0.35 mM catechol (relative fluorescence intensities are represented as  $F/F_0$ , while  $F_0$  and  $F$  correspond to the fluorescence intensity before and after the addition of catechol, respectively).

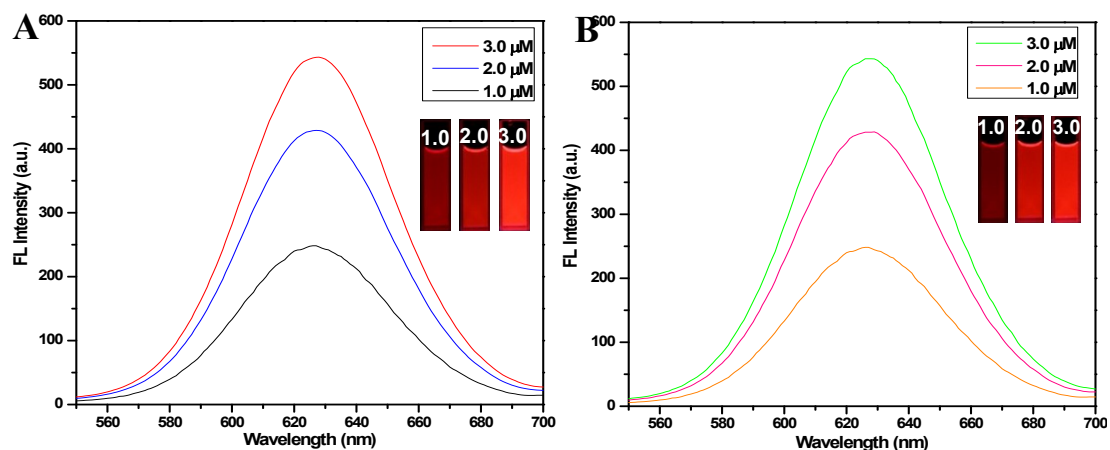

**Fig. S9** The fluorescence spectra of the nanoprobe with the addition of the tap water (A) and lake water (B) which spiked with  $\text{F}^-$  (1.0  $\mu\text{M}$ , 2.0  $\mu\text{M}$ , 3.0  $\mu\text{M}$ ). The inset photographs, corresponding to the three different concentrations of  $\text{F}^-$ , were taken under a 365 nm UV lamp.
